# Supplementary material
Source: Springer Nature journal article supplement (https://www.springermedizin.de/resource/supplementary/13058_2007_2162_MOESM7_ESM.pdf/9700776)

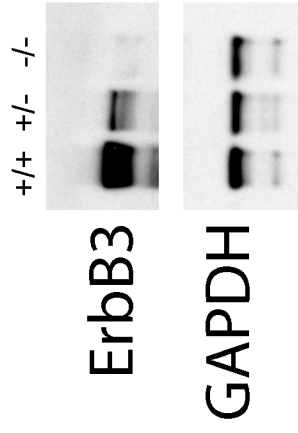

Supplement: MOESM7 [file 9700776]
